# Supplementary material for: Upfront Advanced Radiotherapy and New Drugs for NSCLC Patients with Synchronous Brain Metastases: Is the Juice Worth the Squeeze? A Real-World Analysis from Lombardy, Italy
Source: MDPI journal article supplement (doi:10.3390/cancers15041103), 2023-02-09
Supplement: s1 [file s1]

**Table S1.** ICD-9-CM codes of diagnosis/procedures, ATC codes of drugs and Regional codes of outpatient's services that will be used for the current study.

|                                                                 |                     |
|-----------------------------------------------------------------|---------------------|
| Diagnosis (ICD-9-CM codes)                                      |                     |
| Lung cancer                                                     | 162* (except 162.0) |
| Chemotherapy                                                    | V58.1               |
| Radiotherapy                                                    | V58.0               |
| Brain metastasis                                                | 198.3               |
| Procedures (ICD-9-CM codes)                                     |                     |
| Lung surgery                                                    |                     |
| Other local excision or destruction of lesion or tissue of lung | 32.29               |
| Segmental resection of lung                                     | 32.3                |
| Lobectomy of lung                                               | 32.4                |
| Complete pneumonectomy                                          | 32.5                |
| Radical dissection of thoracic structures                       | 32.6                |
| Other excision of lung                                          | 32.9                |
| Chemotherapy/antineoplastic biological agents                   | 99.25, 99.28        |
| Radiotherapy                                                    | 92.2, 92.3          |
| Drugs (ATC codes)                                               |                     |
| Immunotherapy                                                   |                     |
| Nivolumab                                                       | L01XC17             |
| Pembrolizumab                                                   | L01XC18             |
| Atezolizumab                                                    | L01XC32             |
| Tyrosine kinase inhibitors (TKI)                                |                     |
| Erlotinib                                                       | L01XE03             |
| Gefitinib                                                       | L01XE02             |
| Afatinib                                                        | L01XE13             |
| Dacomitinib                                                     | L01EB07             |
| Osimertinib                                                     | L01EB04             |
| Crizotinib                                                      | L01ED01             |
| Alectinib                                                       | L01ED03             |
| Brigatinib                                                      | L01ED04             |
| Trametinib                                                      | L01EE01             |
| Dabrafenib                                                      | L01EC02             |
| Lorlatinib                                                      | L01ED05             |
| Chemotherapy                                                    |                     |
| Cisplatin                                                       | L01XA01             |
| Carboplatin                                                     | L01XA02             |
| Docetaxel                                                       | L01CD02             |
| Pemetrexed                                                      | L01BA04             |

|                                                                            |                                                            |
|----------------------------------------------------------------------------|------------------------------------------------------------|
| Paclitaxel                                                                 | L01CD01                                                    |
| Vinorelbin                                                                 | L01CA04                                                    |
| Gemcitabin                                                                 | L01BC05                                                    |
| <hr/>                                                                      |                                                            |
| Outpatients service (Regional codes)                                       |                                                            |
| <hr/>                                                                      |                                                            |
| Chemotherapy with administration of high-cost drugs (file F 5 e 3)         | MAC01                                                      |
| Chemotherapy without administration of high-cost drugs (file F 5 e 3)      | MAC02                                                      |
| Anticancer therapy with administration of oral drug or IM                  | MAC04                                                      |
| Injection or infusion of chemotherapy drugs                                | 99.25                                                      |
| Standard radiotherapy (RT)                                                 | 92.24.3, 92.24.5,<br>92.29.F, 92.29.G,<br>92.29.J, 92.29.H |
| Stereotactic radiotherapy (SRT) or intensity modulated radiotherapy (IMRT) | 92.24.6, 92.24.7,<br>92.24.8, 92.29K,<br>92.29.M, 92.29.L  |
| <hr/>                                                                      |                                                            |

**Table S2.** List of conditions and weights assigned to the Cancer Multimorbidity Score.

| <b>Disease/condition</b>                                                                                                                                                                                         | <b>Weight</b> |
|------------------------------------------------------------------------------------------------------------------------------------------------------------------------------------------------------------------|---------------|
| Liver cirrhosis and other liver chronic diseases                                                                                                                                                                 | 8             |
| Coagulation defects                                                                                                                                                                                              | 5             |
| Other diseases of the respiratory system                                                                                                                                                                         | 5             |
| Insulin therapy                                                                                                                                                                                                  | 4             |
| Dementia/Alzheimer                                                                                                                                                                                               | 4             |
| Epilepsy and recurrent seizures                                                                                                                                                                                  | 3             |
| Cystic fibrosis                                                                                                                                                                                                  | 3             |
| Chronic pain                                                                                                                                                                                                     | 3             |
| Psychosis                                                                                                                                                                                                        | 3             |
| Chronic obstructive pulmonary disease                                                                                                                                                                            | 2             |
| Other kidney disorders                                                                                                                                                                                           | 2             |
| Cerebrovascular diseases                                                                                                                                                                                         | 2             |
| Vascular diseases                                                                                                                                                                                                | 2             |
| Anaemias                                                                                                                                                                                                         | 2             |
| Other diseases of the digestive system                                                                                                                                                                           | 2             |
| Diabetes without insulin therapy                                                                                                                                                                                 | 2             |
| Disorders of fluid, electrolyte, and acid-base balance                                                                                                                                                           | 2             |
| Parkinson's disease                                                                                                                                                                                              | 2             |
| Corticosteroids                                                                                                                                                                                                  | 2             |
| Chronic kidney disease (with or without dialysis)                                                                                                                                                                | 2             |
| Infectious and parasitic diseases (HIV infections, tuberculosis or other infectious and parasitic diseases)                                                                                                      | 2             |
| Heart failure                                                                                                                                                                                                    | 1             |
| Multiple sclerosis or other diseases of the nervous system and sense organs                                                                                                                                      | 1             |
| Depression                                                                                                                                                                                                       | 1             |
| Autoimmune disease (Rheumatoid arthritis, Rheumatoid psoriasis, Anchylosing spondylitis, Systemic sclerosis, Systemic lupus erythematosus) or other diseases of the musculoskeletal system and connective tissue | 1             |
| Other diseases of the circulatory system                                                                                                                                                                         | 1             |
| Oral anticoagulant agents                                                                                                                                                                                        | 1             |

|                                                          |   |
|----------------------------------------------------------|---|
| Chronic respiratory disease only tracked by drug therapy | 1 |
| Arrhythmia                                               | 1 |
| Gout                                                     | 1 |
